# Supplementary material for: Solubility, ionic conductivity and viscosity of lithium salts in room temperature ionic liquids
Source: Royal Society of Chemistry journal article supplement (doi:10.1039/b818176d), 2009-01-01
Supplement: b818176d.pdf [file b818176d.pdf]

| Concentration of LiClO <sub>4</sub> in bmimSCN<br>(molarity) | Viscosity (mPa x s) |
|--------------------------------------------------------------|---------------------|
| 0                                                            | 51.3                |
| 0.14                                                         | 61.0                |
| 0.46                                                         | 100.1               |
| 0.92                                                         | 238.3               |
| 1.61                                                         | 636.3               |
| 2.30                                                         | 1795.9              |

| Concentration of LiTFSI in bmimSCN<br>(molarity) | Viscosity (mPa x s) |
|--------------------------------------------------|---------------------|
| 0                                                | 51.3                |
| 0.05                                             | 53.6                |
| 0.16                                             | 65.2                |
| 0.33                                             | 77.8                |
| 0.58                                             | 107.2               |
| 0.82                                             | 142.9               |
| 1.30                                             | 250.0               |
